# Supplementary material for: Similarity and Differences in Inflammation-Related Characteristics of the Peripheral Immune System of Patients with Parkinson’s and Alzheimer’s Diseases
Source: MDPI journal article supplement (doi:10.3390/ijms18122633), 2017-12-06
Supplement: s1 [file s1]

| <b>Alzheimer's disease</b> |                                                                                                  | <b>Parkinson's disease</b> |                                                                                |
|----------------------------|--------------------------------------------------------------------------------------------------|----------------------------|--------------------------------------------------------------------------------|
| IL-12                      | cytotoxic, antiangiogenic, ↑CD8 <sup>+</sup> CTL, ↑NK cells, ↑Th1, ↑IFN $\gamma$ , ↑TNF $\alpha$ | IL-10                      | ↑B cells, ↓Th1, ↓MHC-II, ↓TNF $\alpha$ , ↓IL-1 $\beta$ , ↓IL-12, ↓IFN $\gamma$ |
| IL-18                      | ↓IgE & IgG1, ↑IgG2a, ↑IFN $\gamma$                                                               | IL-2                       | ↓ IL-15, ↑IL-12                                                                |
| IFN $\gamma$               | ↑MHC-I & MHC-II, ↑Th1, ↓Th2, ↑NK cells, ↑IgG2a & IgG3, ↑adhesion & migration of leukocytes       | CRP                        | ↑complement system                                                             |
| IL-6                       | ↓TNF $\alpha$ , ↑Th17, ↑IL-1RA, ↑IL-10, BBB crosses , memory consolidation                       | IL-6                       | ↓TNF $\alpha$ , ↑Th17, ↑IL-1RA, ↑IL-10, BBB crosses, memory consolidation      |
| IL-1 $\beta$               | ↑COX2                                                                                            | IL-1 $\beta$               | ↑COX2                                                                          |
| TNF $\alpha$               | inflammation                                                                                     | TNF $\alpha$               | inflammation                                                                   |

**Table S1.** Summary of key published results related to the similarities and differences between AD and PD in cytokine expression and their effects on the immune and other processes. Similar effects for AD and PD are allocated in cells filled with grey color.
